# Supplementary material
Source: publisher figshare collection journal article supplement (https://karger.figshare.com/ndownloader/files/12753221)
Supplement: Supplementary file 1 [file 12753221]

**Supplementary References**

Balanoff AM, Bever GS, Colbert MW, Clarke JA, Field DJ, Gignac PM, Ksepka DT, Ridgely RC, Smith NA, Torres CR, Walsh S, Witmer LM (2016): Best practices for digitally constructing endocranial casts: Examples from birds and their dinosaurian relatives. J Anat 229, 173–190. [[doi: 10.1111/joa.12378](http://onlinelibrary.wiley.com/doi/10.1111/joa.12378/abstract)]

Carlisle A, Selwood L, Hinds LA, Saunders N, Habgood M, Mardon K, Weisbecker V (2017): Testing hypotheses of developmental constraints on mammalian brain partition evolution, using marsupials. Scientific Reports, 7 no. 4241. [doi: [10.1038/s41598-017-02726-9](https://www.nature.com/articles/s41598-017-02726-9)]

Cox PG, Fagan MJ, Rayfield EJ, Jeffery N (2011): Finite element modeling of squirrel, guinea pig and rat skulls: using geometric morphometrics to assess sensitivity. J Anat 219, 696–709. [doi: [10.1111/j.1469-7580.2011.01436.x](http://onlinelibrary.wiley.com/doi/10.1111/j.1469-7580.2011.01436.x/abstract)]

Cox PG, Faulkes CG (2014): Digital dissection of the masticatory muscles of the naked mole-rat, *Heterocephalus glaber* (Mammalia, Rodentia). PeerJ 2, e448. [doi: [10.7717/peerj.448](https://peerj.com/articles/448/)]

Cox PG, Jeffery N (2011): Reviewing the morphology of the jaw-closing musculature in squirrels, rats, and guinea pigs with contrast-enhanced micro-CT. Anat Rec 294, 915–928. [doi: [10.1002/ar.21381](https://www.ncbi.nlm.nih.gov/pubmed/21538924)]

Cox PG, Rayfield EJ, Fagan MJ, Herrel A, Pataky TC, Jeffery N (2012): Functional evolution of the feeding system in rodents. PLoS ONE 7, e36299. [doi: [10.1371/journal.pone.0036299](http://journals.plos.org/plosone/article?id=10.1371/journal.pone.0036299)]

Degenhardt K, Wright AC, Horng D, Padmanabhan A, Epstein JA (2010): Rapid 3-D phenotyping of cardiovascular development in mouse embryos by micro-CT with iodine staining. Circ Cardio Imaging 3, 314–322. [doi: [10.1161/CIRCIMAGING.109.918482](http://circimaging.ahajournals.org/content/3/3/314.abstract)]

Faulwetter S, Vasileiadou A, Kouratoras M, Dailianis T, Arvanitidis C (2013): Micro-computed tomography: introducing new dimensions to taxonomy. ZooKeys 263, 1–45. [doi: [10.3897/zookeys.263.4261](http://zookeys.pensoft.net/articles.php?id=3650)]

Fernández R, Kvist S, Lenihan J, Giribet G, Ziegler A (2014): Sine systemate chaos? A versatile tool for earthworm taxonomy: non-destructive imaging of freshly fixed and museum specimens using micro-computed tomography. PLoS ONE 9, e96617. [doi: [10.1371/journal.pone.0096617](http://journals.plos.org/plosone/article?id=10.1371/journal.pone.0096617)]

George ID, Holliday CM (2013): Trigeminal nerve morphology in *Alligator mississippiensis* and its significance for crocodyliform facial sensation and evolution. Anat Rec 296, 670–680. [doi: [10.1002/ar.22666](https://www.ncbi.nlm.nih.gov/pubmed/23408584)]

Gignac PM, Kley NJ (2014): Iodine-enhanced micro-CT imaging: methodological refinements for the study of soft-tissue anatomy of post-embryonic vertebrates*.* J Exp Zool Part B (Mol Dev Evol) 322B, 166–176. [doi: [10.1002/jez.b.22561](http://onlinelibrary.wiley.com/doi/10.1002/jez.b.22561/full)]

Gignac PM, Kley NK, Clarke JA, Colbert MW, Morhardt AC, Cerio D, Cost IN, Cox PG, Daza JD, Early CM, Echols MS, Henkelman RM, Herdina AN, Holliday CM, Li Z, Mahlow K, Merchant S, Müller J, Orsbon CP, Paluh DJ, Thies ML, Tsai HP, Witmer LM (2016): Diffusible iodine-based contrast-enhanced computed tomography (diceCT): an emerging tool for rapid, high-resolution, 3-D imaging of metazoan soft tissues. J Anat 228, 889–909. [[doi: 10.1111/joa.12449](http://onlinelibrary.wiley.com/doi/10.1111/joa.12449/abstract)]

Girard R, Zeineddine HA, Orsbon C, Tan H, Moore T, Hobson N, Shenkar R, Lightle R, Shi C, Fam MD, Cao Y, Shen L, Neander AI, Rorrer A, Gallione C, Tang AT, Kahn ML, Marchuk DA, Luo Z-X, Awad IA (2016): Micro-computed tomography in murine models of cerebral cavernous malformations as a paradigm for brain disease. J Neurosci Meth 271, 14–24. [[doi: 10.1016/j.jneumeth.2016.06.021](http://www.sciencedirect.com/science/article/pii/S0165027016301509)]

Gold MEL, Shulz D, Budassi M, Vaska P, Gignac PM, Norell MA (2016): Flying starlings and PET lend insights on the evolution of volant dinosaurs. Curr Biol 26, R265–R267. [[doi: 10.1016/j.cub.2016.02.025](http://www.cell.com/current-biology/abstract/S0960-9822(16)30077-X)]

Holliday CM, Tsai HP, Skiljan RJ, George ID, Pathan S (2013): A 3-D interactive model and atlas of the jaw musculature of *Alligator mississippiensis*. PLoS ONE 8, e62806. [doi: [10.1371/journal.pone.0062806](http://journals.plos.org/plosone/article?id=10.1371/journal.pone.0062806)]

Hughes DF, Gignac PM, Walker EM, Martinez A, Negishi K, Lieb CS, Greenbaum E, Khan AM (2016): Rescuing perishable neuroanatomical information from a threatened biodiversity hotspot: remote field methods for brain tissue preservation validated by semi-quantitative cytoarchitectonic analysis, immunohistochemistry, and iodine-enhanced X-ray microcomputed tomography. PLOS One 11(5), e0155824. [[doi: 10.1371/journal.pone.0155824](http://journals.plos.org/plosone/article?id=10.1371%2Fjournal.pone.0155824)]

Jeffery NS, Stephenson RS, Gallagher JA, Jarvis JC, Cox PG (2011): Micro-computed tomography with iodine staining resolves the arrangement of muscle fibres. J Biomech 44, 189–192. [doi: [10.1016/j.jbiomech.2010.08.027](https://www.ncbi.nlm.nih.gov/pubmed/20846653)]

Lautenschlager S, Bright JA, Rayfield EJ (2013): Digital dissection—using contrast-enhanced computed tomography scanning to elucidate hard- and soft-tissue anatomy of the Common Buzzard *Buteo buteo*. J Anat 224, 412–431. [doi: [10.1111/joa.12153](http://onlinelibrary.wiley.com/doi/10.1111/joa.12153/abstract)]

Li Z, Clarke JA (2016): The craniolingual morphology of waterfowl (Aves, Anseriformes) and its relationship with feeding mode revealed through contrast-enhanced X-ray computed tomography and 2-D morphometrics. J Evol Biol 43, 12–25*.*[[doi: doi:10.1007/s11692-015-9345-4](http://link.springer.com/article/10.1007/s11692-015-9345-4)]

Li Z, Ketcham RA, Yan F, Maisano JA, Clarke JA (2016): Comparison and evaluation of the effectiveness of two approaches of diffusible iodine-based contrast- enhanced computed tomography (diceCT) for avian cephalic material. J Exp Zool (Mol Dev Evol) 326, 352–362. [[doi:10.1002/jez.b.22692](http://onlinelibrary.wiley.com/doi/10.1002/jez.b.22692/abstract)]

Metscher BD (2009a): Micro-CT for comparative morphology: simple staining methods allow high-contrast 3D imaging of diverse non-mineralized animal tissues. BMC Physiol 9, 11. [doi: [10.1186/1472-6793-9-11](http://bmcphysiol.biomedcentral.com/articles/10.1186/1472-6793-9-11)]

Metscher BD (2009b): Micro-CT for developmental biology: a versatile tool for high-contrast 3-D imaging at histological resolutions. Dev Dyn 238, 632–640. [doi: [10.1002/dvdy.21857](http://onlinelibrary.wiley.com/doi/10.1002/dvdy.21857/full)]

Nasrullah Q, Renfree MB, Evans AR (2017): Three-dimensional mammalian tooth development using diceCT. Arch Oral Biol 85,183–191. [[doi:10.1016/j.archoralbio.2017.10.018](http://www.sciencedirect.com/science/article/pii/S0003996917303473?via%3Dihub)]

Porro LB, Richards CT (2017): Digital dissection of the model organism *Xenopus laevis* using contrast-enhanced computed tomography. J Anat 231, 169–191. [[doi:10.1111/joa.12625](http://onlinelibrary.wiley.com/doi/10.1111/joa.12625/full)]

Silva JMdS, Zanette I, Noël PB, Cardoso MB, Kimm MA, Pfeiffer F (2015): Three-dimensional non-destructive soft-tissue visualization with X-ray staining micro-tomography. Sci Rep 5, 14088. [doi: [10.1038/srep14088](http://www.nature.com/articles/srep14088)]

Sombke A, Lipke E, Michalik, Uhl G, Harzsch S (2015): Potential and limitations of X-ray micro-computed tomography in arthropod neuroanatomy: a methodological and comparative survey. J Comp Neurol 523, 1281–1295. [doi: [10.1002/cne.23741](http://onlinelibrary.wiley.com/doi/10.1002/cne.23741/abstract)]

Tahara R, Larson HCE (2013): Quantitative analysis of microscopic X-ray computed tomography imaging: Japanese quail embryonic soft tissue with iodine staining. J Anat 223, 297–310.  [doi: [10.1111/joa.12081](https://www.ncbi.nlm.nih.gov/pubmed/23869493)]

Tobita K, Liu X, Lo CW (2010): Imaging modalities to assess structural birth defects in mutant mouse models. Birth Defects Res C Embryo Today 90, 176–184. [doi: [10.1002/bdrc.20187](http://onlinelibrary.wiley.com/doi/10.1002/bdrc.20187/abstract)]

Wong MD, Dorr AE, Walls JR, Lerch JP, Henkelman RM (2012): A novel 3-D mouse embryo atlas based on micro-CT*.* Development 129, 3248–3256. [doi: [10.1242/dev.082016](http://dev.biologists.org/content/139/17/3248)]

Wong MD, Maezawa Y, Lerch JP, Henkelman RM (2014): Automated pipeline for anatomical phenotyping of mouse embryos using micro-CT. Development 141, 2533–2541. [doi: [10.1242/dev.107722](https://www.ncbi.nlm.nih.gov/pubmed/24850858)]

Wong MD, Spring S, Henkelman RM (2013): Structural stabilization of tissue for embryo phenotyping using micro-CT with iodine staining. PLoS ONE 8, e84321. [doi: [10.1371/journal.pone.0084321](http://journals.plos.org/plosone/article?id=10.1371/journal.pone.0084321)]
